# Supplementary material for: A renewed rise in global HCFC-141b emissions between 2017–2021
Source: Copernicus journal article supplement (doi:10.5194/acp-2022-298), 2022-04-27
Supplement: Supplementary file [file acp-2022-298-supplement.zip]

# A rise in global HCFC-141b emissions between 2017-2021

Luke M. Western<sup>1,2</sup>, Alison L. Redington<sup>3</sup>, Alistair J. Manning<sup>3</sup>, Cathy M. Trudinger<sup>4</sup>, Lei Hu<sup>1,5</sup>, Stephan Henne<sup>6</sup>, Xuekun Fang<sup>7</sup>, Lambert J.M. Kuijpers<sup>8</sup>, Christina Theodoridi<sup>9</sup>, David S. Godwin<sup>10</sup>, Jgor Arduini<sup>11</sup>, Bronwyn Dunse<sup>4</sup>, Andreas Engel<sup>12</sup>, Paul J. Fraser<sup>4</sup>, Christina M. Harth<sup>13</sup>, Paul B. Krummel<sup>4</sup>, Michela Maione<sup>11</sup>, Jens Mühle<sup>13</sup>, Simon O'Doherty<sup>2</sup>, Hyeri Park<sup>14</sup>, Sunyoung Park<sup>14</sup>, Stefan Reimann<sup>6</sup>, Peter K. Salameh<sup>13</sup>, Daniel Say<sup>2</sup>, Roland Schmidt<sup>13</sup>, Tanja Schuck<sup>12</sup>, Carolina Siso<sup>1,5</sup>, Kieran M. Stanley<sup>12</sup>, Isaac Vimont<sup>1,5</sup>, Martin K. Vollmer<sup>6</sup>, Dickon Young<sup>2</sup>, Ronald G. Prinn<sup>15</sup>, Ray F. Weiss<sup>13</sup>, Stephen A. Montzka<sup>1</sup>, and Matthew Rigby<sup>2</sup>

<sup>1</sup>Global Monitoring Laboratory, National Oceanic and Atmospheric Administration, Boulder, CO, USA

<sup>2</sup>School of Chemistry, University of Bristol, Bristol, UK

<sup>3</sup>Hadley Centre, Met Office, Exeter, UK

<sup>4</sup>Climate Science Centre, CSIRO Oceans and Atmosphere, Aspendale, Victoria, Australia

<sup>5</sup>Cooperative Institute for Research in Environmental Sciences, University of Colorado, University of Colorado, USA

<sup>6</sup>Empa, Swiss Federal Laboratories for Materials Science and Technology, Dübendorf, Switzerland

<sup>7</sup>College of Environmental and Resource Sciences, Zhejiang University, China

<sup>8</sup>A/gent b.v. Consultancy, Venlo, Netherlands

<sup>9</sup>Natural Resources Defense Council, USA

<sup>10</sup>Stratospheric Protection Division, Environmental Protection Agency, Washington, DC, USA

<sup>11</sup>Department of Pure and Applied Sciences, University of Urbino, Urbino, Italy

<sup>12</sup>Institute for Atmospheric and Environmental Science, Goethe University Frankfurt, Frankfurt am Main, Germany

<sup>13</sup>Scripps Institution of Oceanography, University of California San Diego, La Jolla, CA, USA

<sup>14</sup>Department of Oceanography, Kyungpook National University, Daegu, Republic of Korea

<sup>15</sup>Center for Global Change Science, Massachusetts Institute of Technology, Cambridge, MA, USA

**Correspondence:** Luke M. Western (luke.western@noaa.gov/luke.western@bristol.ac.uk)

| Station             | Country       | Longitude & Latitude | Instrument         | Data period       |
|---------------------|---------------|----------------------|--------------------|-------------------|
| NOAA                |               |                      |                    |                   |
| South Pole (SPO)    | Antarctica    | 90 °S                | GCMS               | 1993/01 - 2021/12 |
| Cape Grim (CGO)     | Australia     | 41 °S, 145 °E        | GCMS               | 1992/12 - 2021/12 |
| Cape Matatula (SMO) | America Samoa | 14 °S, 171 °W        | GCMS               | 1993/01 - 2021/12 |
| Mauna Loa (MLO)     | USA           | 20 °N, 156 °W        | GCMS               | 1992/12 - 2021/12 |
| Cape Kumukahi (KUM) | USA           | 20 °N, 155 °W        | GCMS               | 1995/11 - 2021/12 |
| Niwot Ridge (NWR)   | USA           | 40 °N, 106 °W        | GCMS, Perseus-GCMS | 1992/12 - 2021/12 |
| Barrow (BRW)        | USA           | 71 °N, 157 °W        | GCMS               | 1993/01 - 2021/12 |
| Alert (ALT)         | Canada        | 83 °N, 62 °W         | GCMS               | 1993/02 - 2020/12 |

|                                       |              |                 |                               |                   |
|---------------------------------------|--------------|-----------------|-------------------------------|-------------------|
| Alaska Coast Guard (ACG)              | USA          | 63 °N, -150 °S  | Perseus-GCMS                  | 2015/07 - 2017/10 |
| Argyle (AMT)                          | USA          | 45 °N, -69 °S   | Perseus-GCMS                  | 2015/01 - 2020/12 |
| Boulder Atmospheric Observatory (BAO) | USA          | 40 °N, -105 °S  | Perseus-GCMS                  | 2015/01 - 2016/07 |
| Briggsdale (CAR)                      | USA          | 41 °N, -104 °S  | Perseus-GCMS                  | 2015/01 - 2020/12 |
| Offshore Cape May (CMA)               | USA          | 39 °N, -74 °S   | Perseus-GCMS                  | 2015/01 - 2020/12 |
| CARVE (CRV)                           | USA          | 65 °N, -148 °S  | Perseus-GCMS                  | 2015/01 - 2020/12 |
| Dahlen (DND)                          | USA          | 47 °N, -99 °S   | Perseus-GCMS                  | 2015/02 - 2016/11 |
| Estevan Point (ESP)                   | Canada       | 49 °N, -126 °S  | Perseus-GCMS                  | 2015/01 - 2020/12 |
| East Trout Lake (ETL)                 | USA          | 54 °N, -105 °S  | Perseus-GCMS                  | 2015/01 - 2020/12 |
| Harvard Forest (HFM)                  | USA          | 43 °N, -72 °S   | Perseus-GCMS                  | 2016/03 - 2020/08 |
| Homer (HIL)                           | USA          | 40 °N, -88 °S   | Perseus-GCMS and Perseus-GCMS | 2015/01 - 2020/12 |
| INFLUX (INX)                          | USA          | 40 °N, -86 °S   | Perseus-GCMS and Perseus-GCMS | 2015/01 - 2020/12 |
| Park Falls (LEF)                      | USA          | 46 °N, -90 °S   | Perseus-GCMS                  | 2015/01 - 2020/12 |
| Lewisburg (LEW)                       | USA          | 41 °N, -77 °S   | Perseus-GCMS                  | 2015/01 - 2020/12 |
| Mt. Bachelor Observatory (MBO)        | USA          | 44 °N, -122 °S  | Perseus-GCMS                  | 2015/02 - 2020/12 |
| Marcellus Pennsylvania (MRC)          | USA          | 41 °N, -78 °S   | Perseus-GCMS                  | 2015/05 - 2020/12 |
| Mashepee (MSH)                        | USA          | 42 °N, -70 °S   | Perseus-GCMS                  | 2016/05 - 2020/12 |
| Mt. Wilson Observatory (MWO)          | USA          | 34 °N, -118 °S  | Perseus-GCMS                  | 2015/01 - 2020/12 |
| NE Baltimore (NEB)                    | USA          | 39 °N, -77 °S   | Perseus-GCMS                  | 2018/04 - 2020/12 |
| Offshore Portsmouth (NHA)             | USA          | 43 °N, -70 °S   | Perseus-GCMS                  | 2015/01 - 2020/12 |
| NW Baltimore (NWB)                    | USA          | 39 °N, -77 °S   | Perseus-GCMS                  | 2018/11 - 2020/12 |
| Poker Flat (PFA)                      | USA          | 65 °N, -149 °S  | Perseus-GCMS                  | 2015/01 - 2020/12 |
| Rarotonga (RTA)                       | Cook Islands | -21 °N, -160 °S | Perseus-GCMS                  | 2015/01 - 2020/11 |
| Offshore Charleston (SCA)             | USA          | 33 °N, -80 °S   | Perseus-GCMS                  | 2015/01 - 2020/12 |
| Beech Island (SCT)                    | USA          | 33 °N, -82 °S   | Perseus-GCMS                  | 2015/01 - 2020/12 |

|                               |     |                |              |                   |
|-------------------------------|-----|----------------|--------------|-------------------|
| Southern Great Plains (SGP)   | USA | 37 °N, -98 °S  | Perseus-GCMS | 2015/01 - 2020/12 |
| Sutro Tower (STR)             | USA | 38 °N, -122 °S | Perseus-GCMS | 2015/01 - 2020/12 |
| Offshore Corpus Christi (TGC) | USA | 28 °N, -97 °S  | Perseus-GCMS | 2015/01 - 2020/12 |
| Trinidad Head (THD)           | USA | 41 °N, -124 °S | Perseus-GCMS | 2015/01 - 2020/12 |
| Thurmont (TMD)                | USA | 40 °N, -77 °S  | Perseus-GCMS | 2017/08 - 2020/12 |
| West Branch (WBI)             | USA | 42 °N, -91 °S  | Perseus-GCMS | 2015/01 - 2020/12 |
| Walnut Grove (WGC)            | USA | 38 °N, -121 °S | Perseus-GCMS | 2015/01 - 2020/12 |
| Moody (WKT)                   | USA | 31 °N, -97 °S  | Perseus-GCMS | 2015/01 - 2020/12 |

Table S2: Measurements used in this work from the NOAA network. Samples used to derive global emissions were collected at the stations ALT, BRW, NWR, KUM, MLO, SMO, CGO and SPO. Data from these stations, along with a few other sites (ESP, THD, PFA and RTA), were also used for deriving background for NOAA inversions. Emissions estimates for the USA were derived from data collected at all North American stations. The measurements were obtained from air collected in flasks that is subsequently analysed in the Boulder, USA, laboratories on a single GCMS. The data period is the periods of data used in this work and not the periods of data availability. CARVE is the Carbon in Arctic Reservoirs Vulnerability Experiment; INFLUX is the Indianapolis Flux Experiment.

| Station             | Country        | Longitude & Latitude | Instrument                         | Data period                                                 |
|---------------------|----------------|----------------------|------------------------------------|-------------------------------------------------------------|
| AGAGE               |                |                      |                                    |                                                             |
| Mace Head (MHD)     | Ireland        | 53 °N, 10 °W         | GCMS-Medusa<br>ADS–GCMS            | 2003/11 - 2021/12<br>1994/11 - 2004/12                      |
| Trinidad Head (THD) | USA            | 41 °N, 124 °W        | GCMS-Medusa<br>Archive             | 2005/03 - 2021/12<br>1973/10 - 2016/04                      |
| Ragged Point (RPB)  | Barbados       | 13 °N, 59 °W         | GCMS-Medusa                        | 2005/05 - 2021/12                                           |
| Cape Matatula (SMO) | American Samoa | 14 °S, 171 °W        | GCMS-Medusa                        | 2006/05 - 2021/12                                           |
| Cape Grim (CGO)     | Australia      | 41 °S, 145 °E        | GCMS-Medusa<br>ADS–GCMS<br>Archive | 2004/01 - 2021/12<br>1998/03 - 2004/12<br>1978/04 - 2011/06 |
| Gosan (GSN)         | South Korea    | 33 °N, 126 °E        | GCMS-Medusa                        | 2008/01 - 2020/12                                           |
| Jungfraujoch (JFJ)  | Switzerland    | 47 °N, 8 °E          | GCMS-Medusa                        | 2008/02 - 2020/12                                           |
| Monte Cimone (CMN)  | Italy          | 44 °N, 10 °E         | ADS–GCMS                           | 2012/01 - 2020/12                                           |
| Tacolneston (TAC)   | UK             | 53 °N, 1 °E          | GCMS-Medusa                        | 2012/12 - 2020/12                                           |
| Taunus (TOB)        | Germany        | 50 °N, 8 °E          | GCMS                               | 2013/10 - 2020/12                                           |

**Table S1.** Measurements used in this work. Mole fraction measurements from MHD, THD, RPB, SMO and CGO were used to derive global emissions. Measurements from GSN were used to derive emissions in East Asia and measurements from MHD, JFJ, CMN, TAC and TOB were used to derive emissions in Europe. The data period is the periods of data used in this work and not the periods of data availability. Measurements with the instrument listed as GCMS-Medusa were measured in situ, whereas those listed as Archive were measured with a GCMS-Medusa instrument ex situ.
